# Supplementary material for: Depleted lamin B1: a possible marker of the involvement of senescence in endometriosis?
Source: Springer Nature journal article supplement (doi:10.1007/s00404-018-4691-y), 2018-02-07
Supplement: MOESM1 [file 15445270]

SUPPLEMENTARY FIGURE 1. Representative immunohistochemistry images of p21 staining


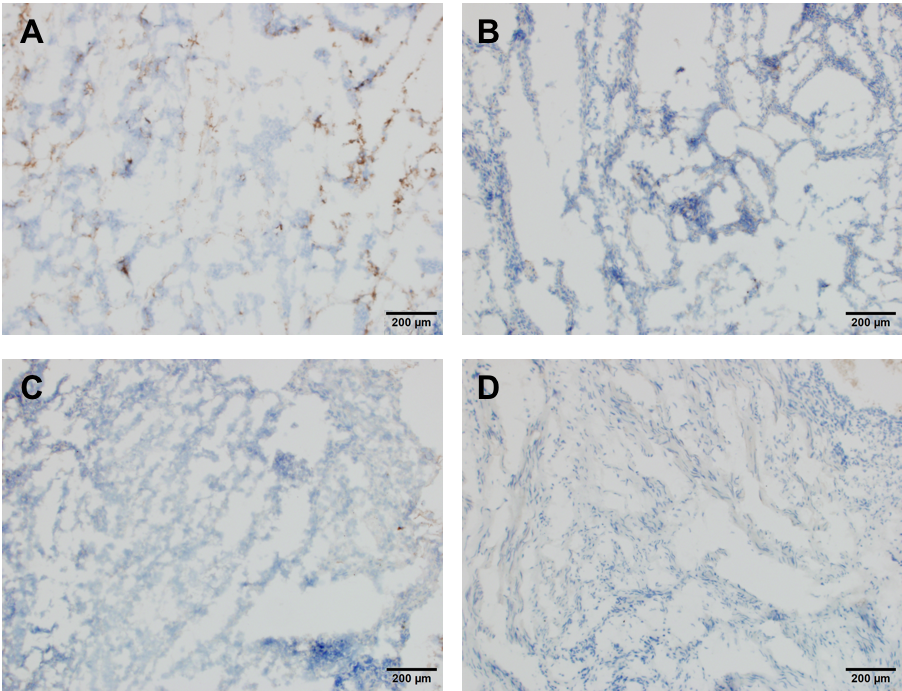


Representative immunohistochemistry images of p21 staining (brown) on rectum tissue as positive control (A); no p21 protein detection on normal endometrium (B), eutopic endometrium (C) and ectopic endometrium (D).
